# Supplementary material for: Patterns of exposure to infectious diseases and social contacts in early life and risk of brain tumours in children and adolescents: an International Case–Control Study (CEFALO)
Source: PubMed Central journal article supplement — Br J Cancer. 2013 May 7;108(11):2346–53. doi: 10.1038/bjc.2013.201 (PMC3681020; doi:10.1038/bjc.2013.201), 2013-05-07
Supplement: bjc2013201x1.pdf [file bjc2013201x1.pdf]

## Online appendix 1: Infectious calendar

### Number of illnesses

| Child's age | Season | Number of illness        |                          |                          |                          |                          | Most common reason for illness<br>(Write no. from list)<br>(Start with most frequent) |
|-------------|--------|--------------------------|--------------------------|--------------------------|--------------------------|--------------------------|---------------------------------------------------------------------------------------|
|             |        | Once or less a month     | 2-3 days a month         | 4-7days a month          | 8-14 days a month        | 15 days or more a month  |                                                                                       |
| 0-1 years   | Winter | <input type="checkbox"/> | _   _   _  specify: _____                                                             |
|             | Summer | <input type="checkbox"/> | _   _   _  specify: _____                                                             |
| 1-2 years   | Winter | <input type="checkbox"/> | _   _   _  specify: _____                                                             |
|             | Summer | <input type="checkbox"/> | _   _   _  specify: _____                                                             |
| 2-3 years   | Winter | <input type="checkbox"/> | _   _   _  specify: _____                                                             |
|             | Summer | <input type="checkbox"/> | _   _   _  specify: _____                                                             |
| 3-6 years   | Winter | <input type="checkbox"/> | _   _   _  specify: _____                                                             |
|             | Summer | <input type="checkbox"/> | _   _   _  specify: _____                                                             |

List of common infections in children:

1. Cold
2. Fever without known cause
3. Middle ear infection
4. Tonsillitis,
5. Bronchitis
6. Pneumonia
7. Infections of the skin
8. Urinary tract infection
9. Stomach flu
10. Other, specify
